# Supplementary material for: Quantitative Phase Imaging of Spreading Fibroblasts Identifies the Role of Focal Adhesion Kinase in the Stabilization of the Cell Rear
Source: MDPI journal article supplement (doi:10.3390/biom10081089), 2020-07-22

A

Image sequence

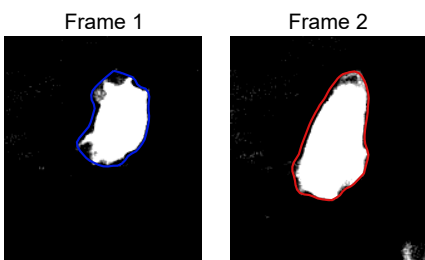

Cell outlines

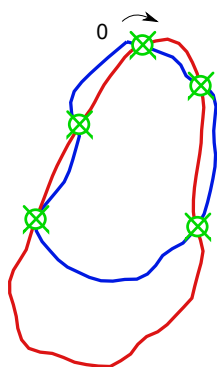

ECMM mapping

Frame map 1 to 2

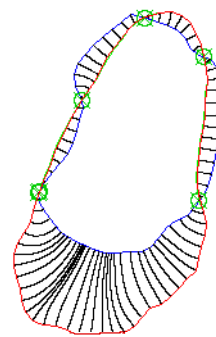

B

Cell outline

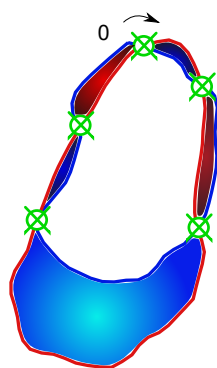

Motility map

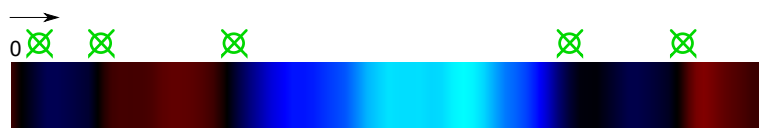

C

Cell outline

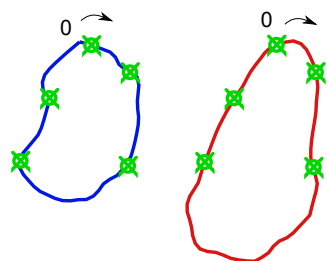

Frame 1

Frame 2

Convexity map

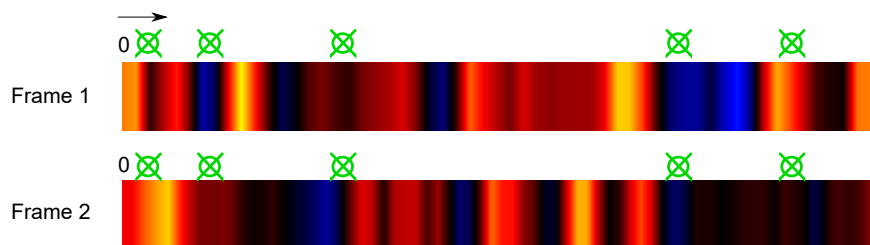

Supplement: s1 [file s1]
