# Supplementary figures and images for: Quantitative Phase Imaging of Spreading Fibroblasts Identifies the Role of Focal Adhesion Kinase in the Stabilization of the Cell Rear
Source: MDPI journal article supplement (doi:10.3390/biom10081089), 2020-07-22

Rack1 siRNA

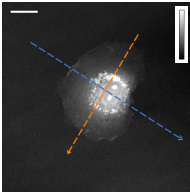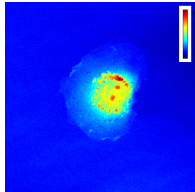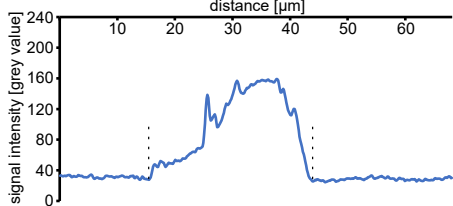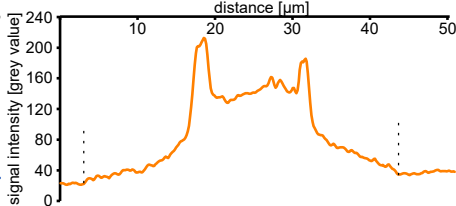

Supplement: s1 [file s1]

**FAK****Actin****Merge**

Ctrl

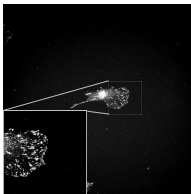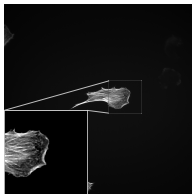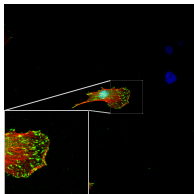

FAK KD

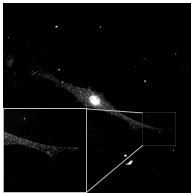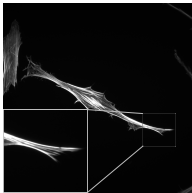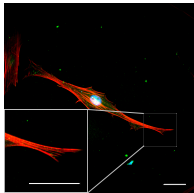

Supplement: s1 [file s1]

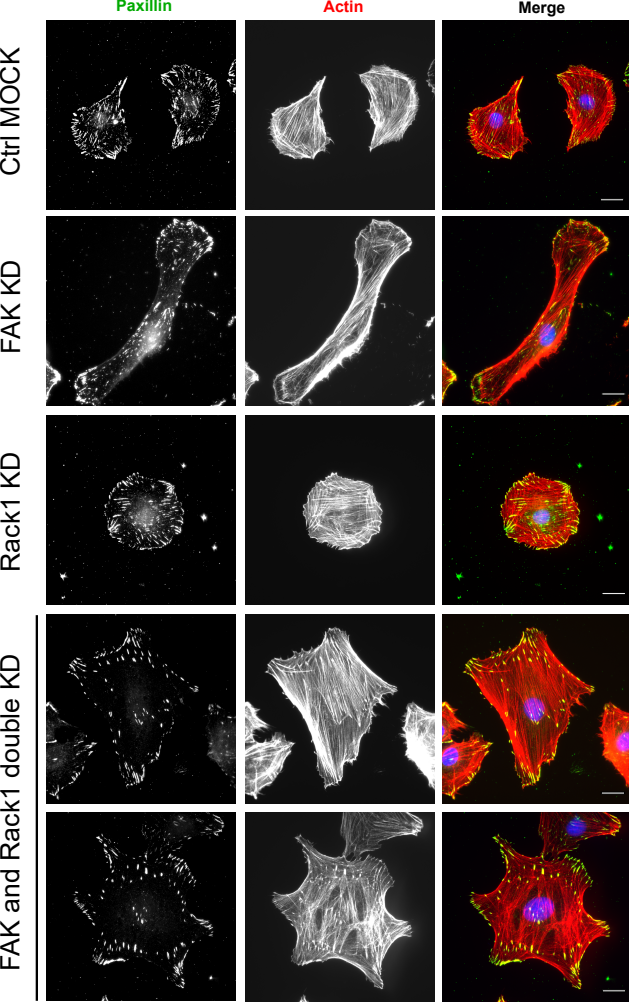

Supplement: s1 [file s1]

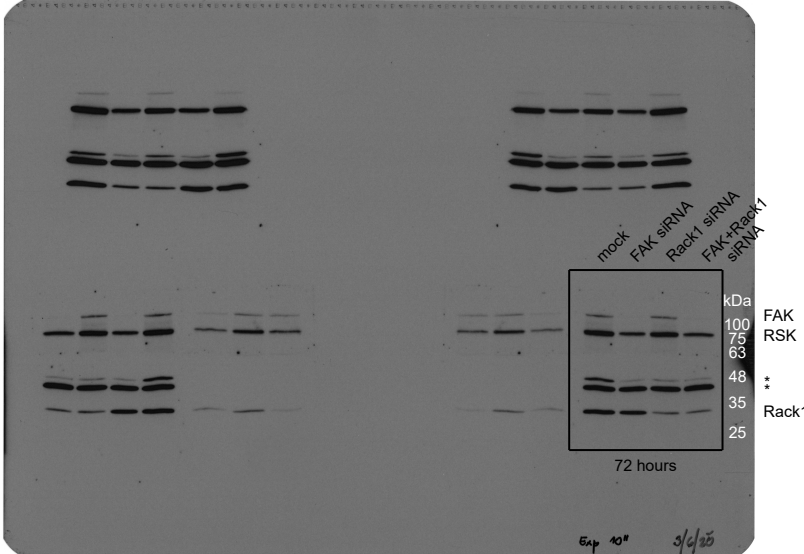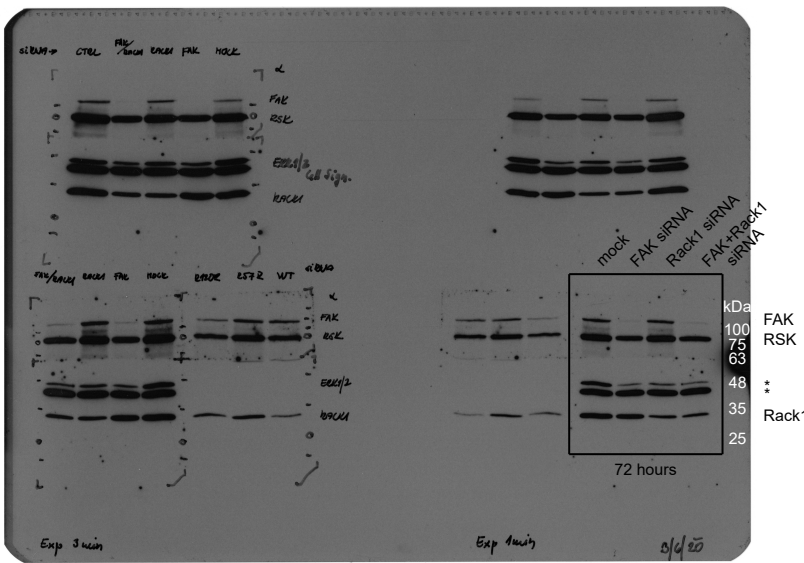

Supplement: s1 [file s1]

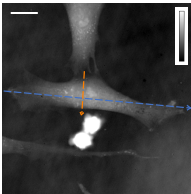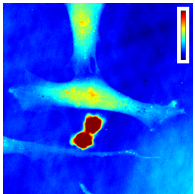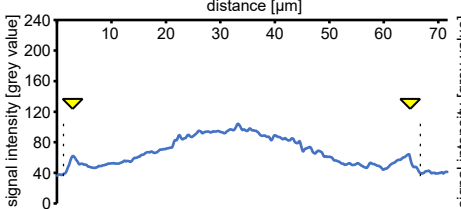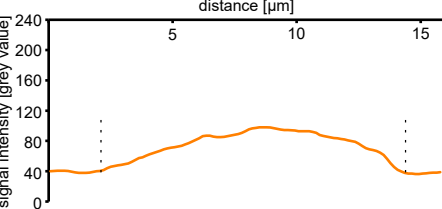

Supplement: s1 [file s1]

**A**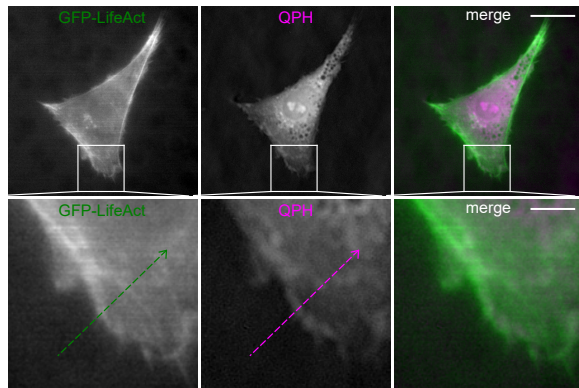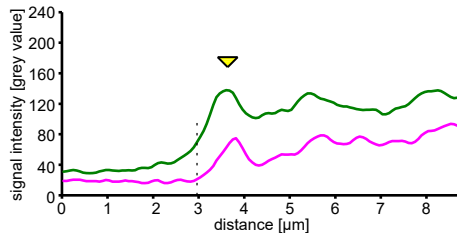**B**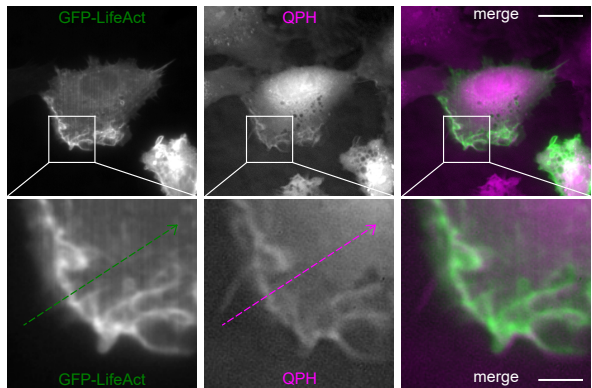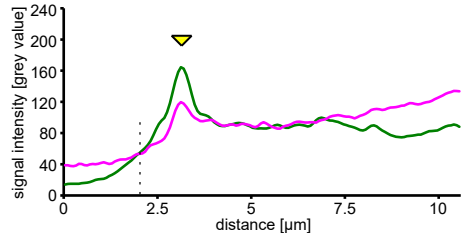

Supplement: s1 [file s1]

**A**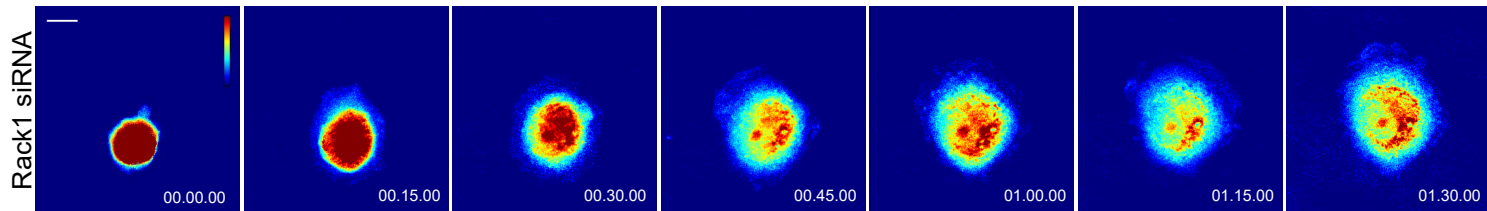**B**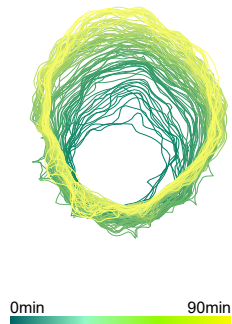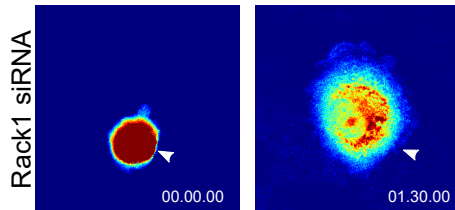**C**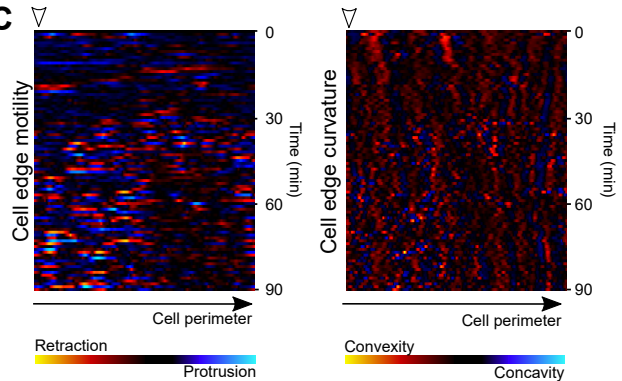

Supplement: s1 [file s1]
